# Supplementary material
Source: Springer Nature journal article supplement (https://www.springermedizin.de/resource/supplementary/12990_2009_221_MOESM6_ESM.pdf/9612818)

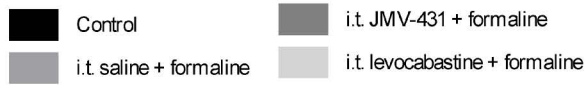

**A**

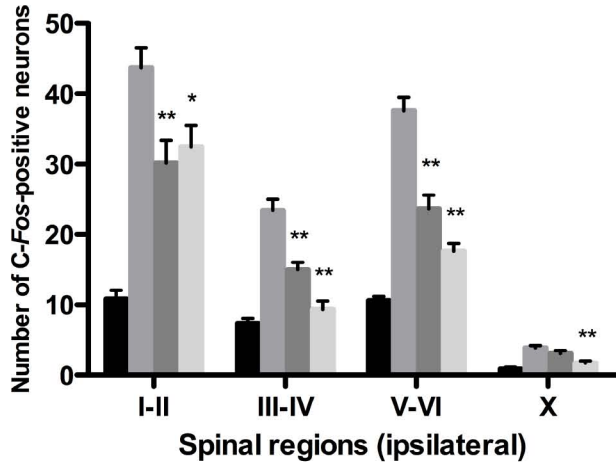

**B**

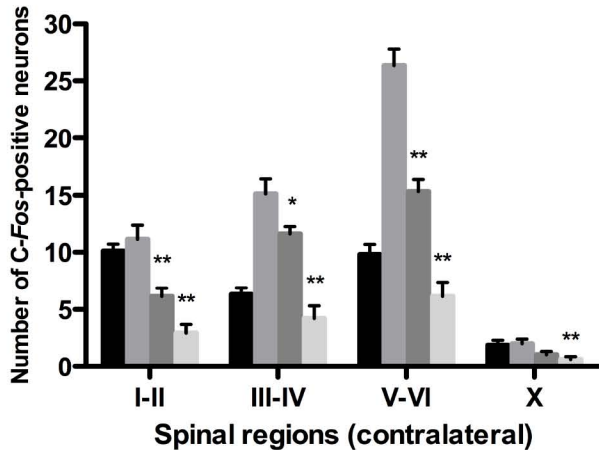

Supplement: MOESM6 [file 9612818]
